# Supplementary material for: Nanopore sequencing reveals full‐length Tropomyosin 1 isoforms and their regulation by RNA‐binding proteins during rat heart development
Source: PubMed Central journal article supplement (PMC8419188; doi:10.1111/jcmm.16795), 2021-07-24

Supplementary figure 2

*Tpm2* transcripts in embryonic (E20) rat hearts

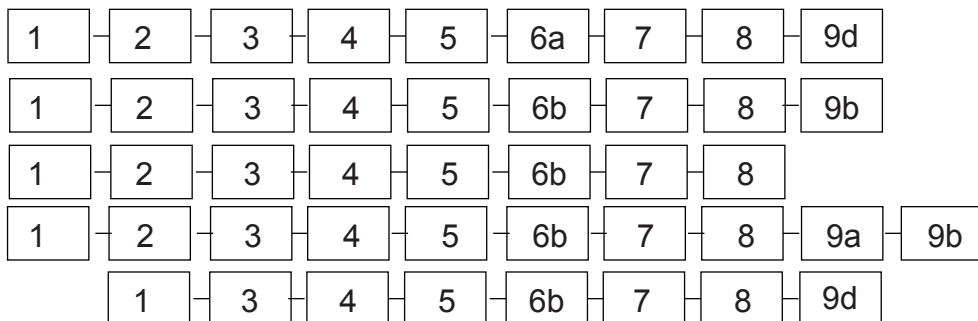

*Tpm2* transcripts in adult (6M) rat hearts

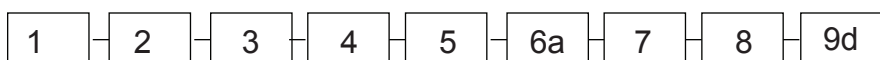

*Tpm3* transcripts in embryonic (E20) rat hearts

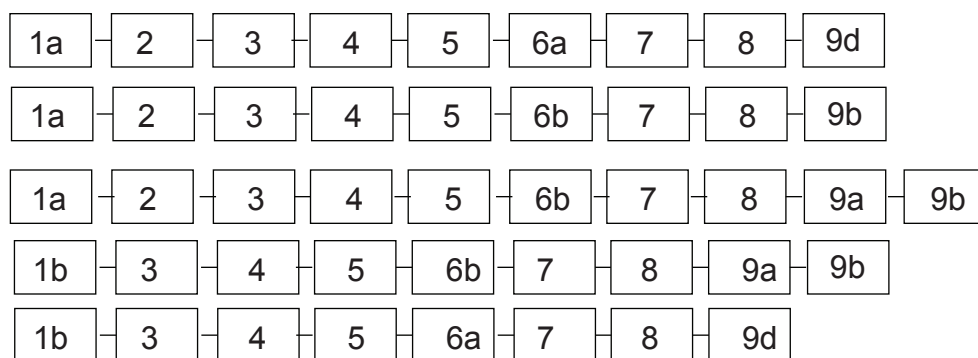

*Tpm3* transcripts in adult (6M) rat hearts

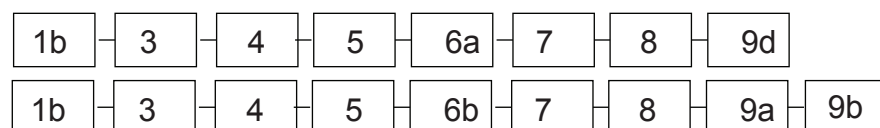

*Tpm4* transcripts in embryonic (E20) rat hearts

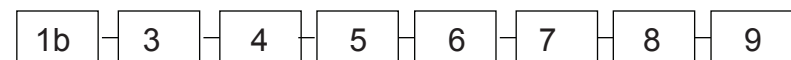

*Tpm4* transcripts in adult (6M) rat hearts

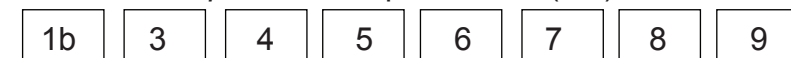

Supplement: JCMM-25-8352-s004.pdf [file JCMM-25-8352-s004.pdf]
